# Supplementary material
Source: PubMed Central journal article supplement (PMC6055917)
Supplement: NIHMS981580-supplement-supplement_1.pdf [file NIHMS981580-supplement-supplement_1.pdf]

791 **Supplemental Figures**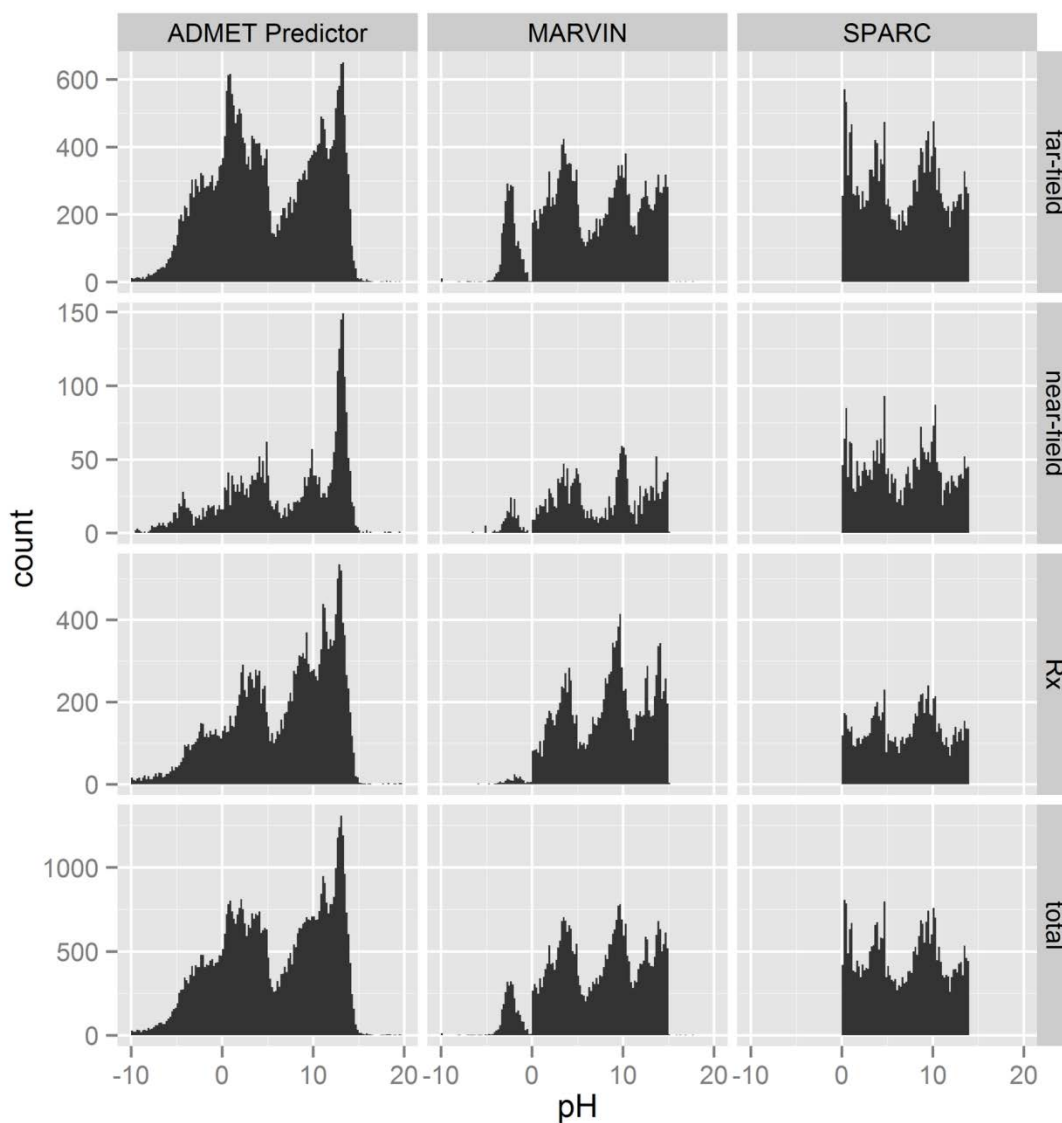

792

793 **Fig. S1.** Comparison of  $pK_a$  prediction distributions made by ADMET Predictor, MARVIN, and

794 SPARC for near-field, far-field, and pharmaceutical compounds, and the entire data set.

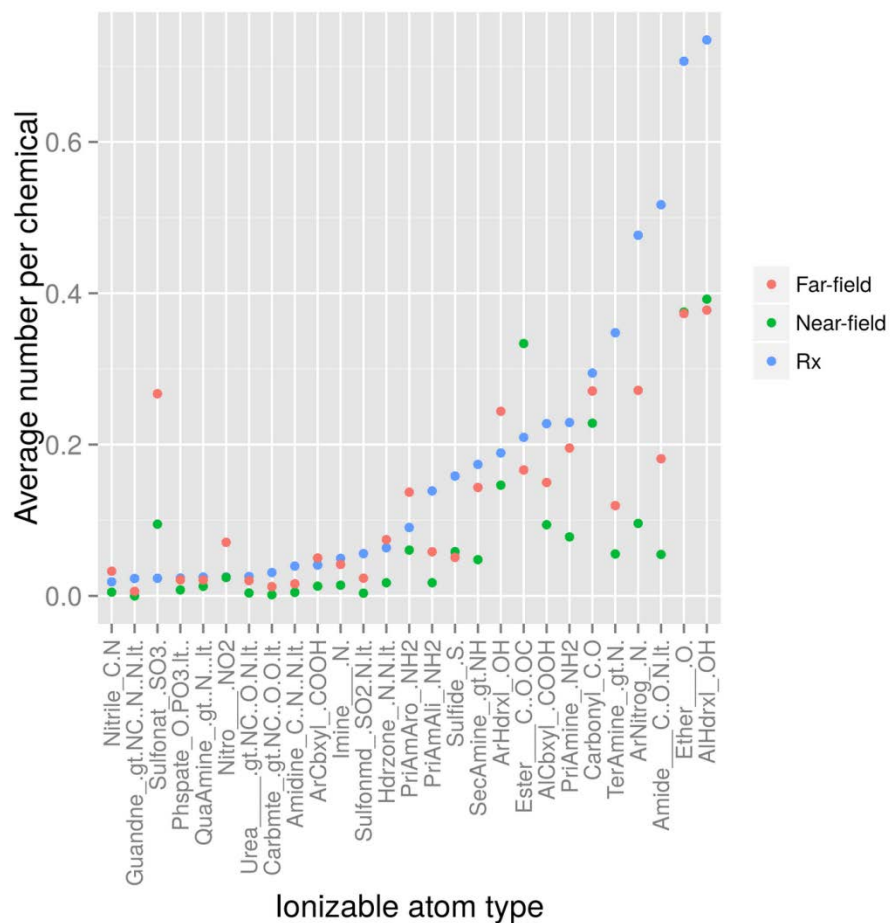

795

796 **Fig. S2.** Average number of occurrences of the most prevalent atom types per compound for  
 797 pharmaceutical near- and far-field environmental chemicals, sorted by the average number of  
 798 each atom type that is in pharmaceutical compounds.

799

800 **Table S1.** Number of predicted neutral chemicals per chemical class for ChemAxon  $pK_a$  plug-in.

| Chemical Class | Non-ionizable Chemicals | Total Chemicals | Percent Neutral |
|----------------|-------------------------|-----------------|-----------------|
| Pharmaceutical | 1015                    | 7766            | 13%             |
| Near-field     | 2575                    | 3888            | 66%             |
| Far-field      | 9051                    | 20759           | 47%             |

801

802

## 803 **Appendix**

804 Several  $pK_a$  prediction programs exist (Liao and Nicklaus, 2009). Commercial predictors  
805 span a range of mechanisms to predict the protonation state of particular atoms, including linear  
806 free energy relationships (LFER) that use a dictionary of chemical substructures (Lee et al.,  
807 2007), quantitative structure-property relationships (QSPR) (Jover et al., 2008; Palaz et al.,  
808 2012), and quantum chemical and *ab initio* methods (Bochevarov et al., 2013; Eckert and Klamt,  
809 2006; Eckert et al., 2009; Klamt et al., 2010; Klamt et al., 2003; Vareková et al., 2011). Semi-  
810 empirical models calculate descriptors for each ionizable chemical functional group, after which  
811  $pK_a$  values are predicted using machine learning or tree-based models (Jelfs et al., 2007; Xing et  
812 al., 2003). These semi-empirical models are limited by the number of chemicals used (Xing et  
813 al., 2003) and the usage of a proprietary, non-releasable training set (Jelfs et al., 2007).

814 Empirical methods employ substructure databases and use LFER to predict  $pK_a$  values based  
815 on the prior assignments for the atomic groups stored in a database. As such, their prediction  
816 accuracy is limited to the substructures contained in their database. If additional training data are  
817 available, many of these tools can be recalibrated to apply to new chemical structures.  
818 Unfortunately, such data are not available for many environmental chemicals. The data  
819 limitations of these methods will improve with the addition of more  $pK_a$  data and could be aided  
820 by efforts to contribute  $pK_a$  data that are currently underway  
821 (<https://gist.github.com/egonw/5aa53abe480a8625fe81>). Such is also the case with predictors  
822 using QSPR. These prediction methods have been developed using machine learning algorithms  
823 along with structural and chemical descriptors to make predictions of  $pK_a$  values (Fraczkiewicz  
824 et al., 2014; Szegezdi and Csizmadia, 2007; Szegezdi and Czismadia, 2004).

825 Quantum chemical methods and *ab initio* methods offer great promise, but currently both are  
826 computationally intensive and generally do not perform as well as LFER and QSPR methods  
827 (Elyashberg et al., 2010). Due to their computational inefficiency, these methods are  
828 incompatible with high-throughput methodologies.

829 The majority of  $pK_a$  prediction programs inspect a particular chemical, including the  
830 interplay between ionizable sites, to predict the  $pK_a$  value. Calculating the interactions between  
831 sites, however, exponentially increases the computation time. In SPARC (Lee et al., 2007),  
832 chemicals with complex atomic interactions can result in calculations that last weeks to months  
833 for a single chemical, for which SPARC will return an incomplete calculation error (Lee et al.,  
834 2007).

835
